# Supplementary material for: Development and field validation of a systematic dental data collection protocol for armed conflict settings: a proposal for standardized humanitarian oral health surveillance
Source: Research Square preprint supplement (doi:10.21203/rs.3.rs-8745837/v1), 2026-02-13
Supplement: Supplementary file 1 [file bca8c7f1dfa9f5acaa5c03a2.docx]

**STROBE Statement—Checklist of items that should be included in reports of cross-sectional studies**

Manuscript: *Development and field validation of a systematic dental data collection protocol for armed conflict settings: a proposal for standardized humanitarian oral health surveillance*

| **Item No** | **Section/Topic** | **Recommendation** | **Reported on page/section** |
| --- | --- | --- | --- |
| 1 | Title and abstract | (a) Indicate the study's design with a commonly used term in the title or the abstract  (b) Provide in the abstract an informative and balanced summary of what was done and what was found | Title: 'a proposal for standardized humanitarian oral health surveillance'; Abstract: 'cross-sectional study' clearly stated  Abstract section (structured: Background, Methods, Results, Conclusions) |
| 2 | Background/rationale | Explain the scientific background and rationale for the investigation being reported | Background section, paragraphs 1–5 (including new paragraph on stress/nutrition relationship) |
| 3 | Objectives | State specific objectives, including any prespecified hypotheses | Background section, final paragraph: 'Our objectives were to: (1)... (2)... (3)... (4)... (5)...' |
| 4 | Study design | Present key elements of study design early in the paper | Methods: 'Study design and setting' – 'This cross-sectional study...' |
| 5 | Setting | Describe the setting, locations, and relevant dates, including periods of recruitment, exposure, follow-up, and data collection | Methods: 'Study design and setting' – Ukraine, September 17–30, 2025 |
| 6 | Participants | Cross-sectional study: Give the eligibility criteria, and the sources and methods of selection of participants | Methods: 'Participants' and 'Protocol components' Phase 3 – eligibility criteria stated |
| 7 | Variables | Clearly define all outcomes, exposures, predictors, potential confounders, and effect modifiers. Give diagnostic criteria, if applicable | Methods: 'Clinical examination' (DMFT criteria) and 'Questionnaire' (variables defined) |
| 8 | Data sources/measurement | For each variable of interest, give sources of data and details of methods of assessment (measurement). Describe comparability of assessment methods if there is more than one group | Methods: 'Clinical examination' – WHO criteria, single examiner; 'Questionnaire' – validated instruments |
| 9 | Bias | Describe any efforts to address potential sources of bias | Methods: Single examiner (eliminates inter-examiner variability); Discussion: Limitations section |
| 10 | Study size | Explain how the study size was arrived at | Methods: 'Participants' – 230 of 1028 civilians seeking dental services |
| 11 | Quantitative variables | Explain how quantitative variables were handled in the analyses. If applicable, describe which groupings were chosen and why | Methods: 'Statistical analysis'; Age groups defined in Results: Table 2 |
| 12 | Statistical methods | (a) Describe all statistical methods, including those used to control for confounding  (b) Describe any methods used to examine subgroups and interactions  (c) Explain how missing data were addressed  (d) Cross-sectional study: If applicable, describe analytical methods taking account of sampling strategy  (e) Describe any sensitivity analyses | Methods: 'Statistical analysis' – chi-square, ANOVA, Kruskal-Wallis, p < 0.05, SPSS 30.0  Methods: Age group comparisons described  Results: 100% data completeness reported  Methods: Convenience sampling acknowledged; Discussion: Limitations  Not applicable/Not reported |
| 13 | Participants | (a) Report numbers of individuals at each stage of study  (b) Give reasons for non-participation at each stage  (c) Consider use of a flow diagram | Results: 'Participant characteristics' – 1028 received care, 230 included  Methods: Only those seeking dental services included  Figure 1: Protocol flowchart (not participant flow) |
| 14 | Descriptive data | (a) Give characteristics of study participants (eg demographic, clinical, social) and information on exposures and potential confounders  (b) Indicate number of participants with missing data for each variable of interest | Results: Table 2 – demographics, oral hygiene practices, smoking, alcohol  Results: 100% data completeness (no missing data) |
| 15 | Outcome data | Cross-sectional study: Report numbers of outcome events or summary measures | Results: Table 2 – DMFT components, prevalence rates; 'Oral health status' section |
| 16 | Main results | (a) Give unadjusted estimates and, if applicable, confounder-adjusted estimates and their precision (eg, 95% confidence interval). Make clear which confounders were adjusted for and why they were included  (b) Report category boundaries when continuous variables were categorized  (c) If relevant, consider translating estimates of relative risk into absolute risk for a meaningful time period | Results: 'Age-related patterns'; Figure 2: β = 0.142, 95% CI: 0.093–0.190, R² = 0.224  Results: Table 2 – Age groups: 12–19, 20–44, 45–64, ≥65 years  Not applicable (cross-sectional prevalence study) |
| 17 | Other analyses | Report other analyses done—eg analyses of subgroups and interactions, and sensitivity analyses | Results: Age-stratified analyses in Table 2, 'Age-related patterns' section, and 'Protocol adaptations during field implementation' |
| 18 | Key results | Summarise key results with reference to study objectives | Discussion: Paragraphs 1–2 summarize feasibility, reliability, and epidemiological findings |
| 19 | Limitations | Discuss limitations of the study, taking into account sources of potential bias or imprecision. Discuss both direction and magnitude of any potential bias | Discussion: 'Limitations' section – 8 limitations listed including PSI-10 unfeasibility |
| 20 | Interpretation | Give a cautious overall interpretation of results considering objectives, limitations, multiplicity of analyses, results from similar studies, and other relevant evidence | Discussion: Paragraphs 3–6 interpret findings in context of prior research; 'Lessons learned and proposed protocol enhancements' section |
| 21 | Generalisability | Discuss the generalisability (external validity) of the study results | Discussion: Limitations section addresses generalizability to broader Ukrainian population |
| 22 | Funding | Give the source of funding and the role of the funders for the present study and, if applicable, for the original study on which the present article is based | Declarations: 'Funding' – MacKay Memorial Hospital Grant 114021102; funder role stated |

*Reference: von Elm E, Altman DG, Egger M, Pocock SJ, Gøtzsche PC, Vandenbroucke JP; STROBE Initiative. The Strengthening the Reporting of Observational Studies in Epidemiology (STROBE) statement: guidelines for reporting observational studies. J Clin Epidemiol. 2008;61(4):344-349.*
